# Supplementary material
Source: publisher site journal article supplement (https://www.dovepress.com/article/302416)
Supplement: Supplementary file 1 [file get_supplementary_file.php]

**Supplementary material** Clinical data of the MSSA isolates

| Isolate | Age | Sex | Year | Comorbility | PIF | Acquired | Complication | Outcome | LHD | Treatment | | | | | | | | |
| --- | --- | --- | --- | --- | --- | --- | --- | --- | --- | --- | --- | --- | --- | --- | --- | --- | --- | --- |
| DC | CRO | CTX | MEM | CLI | CIP | LZD | VAN | TEC |
| Sa-132 | Infant | M | 2011 | Heart disease | CVC | HA | Sepsis | Alive | 11 |  | 0 to +10 |  |  |  |  |  |  |  |
| Sa-134 | Infant | M | 2011 | Oncological disorder | CVC | HA | Sepsis | Alive | 7 |  | 0 to +7 |  |  |  |  |  | 0 to +7 |  |
| Sa-135 | Infant | F | 2011 | None | SSTI | CA | None | Alive | 7 |  |  |  |  | 0 to +7 |  |  |  |  |
| Sa-140 | Middle childhood | F | 2011 | Oncological disorder | Surgical wound | HA | None | Alive | 26 |  |  |  |  |  |  |  | +6 to +14 |  |
| Sa-141 | Infant | M | 2011 | Oncological disorder | OC | HA | None | Alive | 23 | 0 to +11 |  |  |  |  |  |  |  |  |
| Sa-144 | Early childhood | F | 2011 | Oncological disorder | CVC | HA | SSTI | Alive | 105 |  |  |  | +54 to +75 |  |  |  | +23 to +44 |  |
| Sa-146 | Infant | M | 2012 | Oncological disorder | OC | HA | None | Alive | 51 |  |  |  |  |  |  |  | 0 to +10 |  |
| Sa-148 | Early adolescence | M | 2012 | Hematological disorder | CVC | HA | Sepsis | Alive | 58 | +3 to +11 |  |  |  |  |  |  | 0 to +3 |  |
| Sa-149 | Early adolescence | M | 2012 | Oncological disorder | CVC | HA | Septic shock | *Death* | 25 |  |  |  |  |  |  |  | -2 to +23 |  |
| Sa-150 | Infant | M | 2012 | None | SSTI | CA | None | Alive | 14 | 0 to +8 |  |  |  | -7 to 0 |  |  |  |  |
| Sa-155 | Early adolescence | M | 2012 | Neurological disorder | CVC | HA | None | Alive | 25 |  |  |  |  |  |  |  |  | 0 to +14 |
| Sa-162 | Infant | M | 2012 | None | None | CA | None | Death | 6 | +4 to +6 |  |  |  |  |  |  |  |  |
| Sa-163 | Infant | M | 2012 | Oncological disorder | CVC | CA | Sepsis | Alive | 20 |  |  |  |  |  |  |  | +1 to +11 |  |
| Sa-164 | Infant | F | 2012 | Liver disease | CVC | CA | None | Alive | 16 | +3 to +13 |  |  |  |  |  |  |  |  |
| Sa-165 | Middle childhood | M | 2012 | Oncological disorder | CVC | HA | Sepsis | Alive | 34 | +3 to +4 |  |  |  |  |  |  | +8 to +29 |  |
| Sa-170 | Infant | F | 2013 | None | CVC | HA | None | Alive | 119 | +3 to +18 | +8 to +15 |  |  |  |  |  | 0 to +3 |  |
| Sa-173 | Early adolescence | F | 2013 | Oncological disorder | CVC | HA | Sepsis | Alive | 12 | +2 to +12 |  | +1 to +11 |  |  |  |  |  |  |
| Sa-175 | Toddler | M | 2013 | Metabolic disease | CVC | HA | None | Alive | 31 | +7 to +17 |  |  |  |  |  |  | +2 to +7 |  |
| Sa-176 | Early childhood | M | 2013 | Hematological disorder | None | CA | None | Alive | 8 | 0 to +7 | 0 to +17 |  |  |  |  |  |  |  |
| Sa-180 | Early childhood | M | 2013 | Oncological disorder | None | HA | None | Alive | 27 | +3 to +4 |  |  |  |  |  |  | +4 to +18 |  |
| Sa-181 | Early adolescence | F | 2013 | Oncological disorder | CVC | HA | Septic shock | Alive | 29 |  |  |  |  |  |  |  | +8 to +35 |  |
| Sa-182 | Infant | F | 2013 | None | CVC | HA | Sepsis | *Death* | 5 |  |  |  |  |  |  |  | +2 to +3 |  |
| Sa-183 | Middle childhood | F | 2013 | None | CVC | HA | Sepsis | Alive | 32 |  |  |  |  |  |  |  | +16 to +20 |  |
| Sa-184 | Infant | F | 2013 | Congenital disease | CVC | HA | None | Death | 34 | +5 to +9 |  |  |  |  |  |  | +1 to +5 |  |
| Sa-185 | Infant | M | 2013 | None | CVC | HA | Sepsis | Alive | 23 | 0 to +5 |  |  |  |  |  |  | +5 to +16 |  |
| Sa-186 | Early childhood | F | 2013 | Oncological disorder | CVC | HA | Sepsis | Alive | 12 | 0 to +7 |  |  |  |  |  |  |  |  |
| Sa-188 | Infant | F | 2013 | None | SSTI | CA | None | Alive | 5 |  |  |  |  | 0 to +2 |  |  |  |  |
| Sa-191 | Early adolescence | F | 2013 | Oncological disorder | CVC | HA | None | Alive | 31 |  |  |  | +2 to +16 |  |  |  | +2 to +16 |  |
| Sa-192 | Middle childhood | F | 2013 | None | Bone | CA | None | Alive | 4 | 0 to +2 |  |  |  |  |  |  |  |  |
| Sa-198 | Middle childhood | F | 2014 | Hematological disorder | CVC | HA | None | Death | 28 | 0 to +1 |  |  |  |  |  |  | +1 to +14 |  |
| Sa-200 | Middle childhood | F | 2014 | Oncological disorder | Surgical wound | HA | None | Alive | 30 |  |  |  |  |  |  |  | 0 to +29 |  |
| Sa-201 | Infant | F | 2014 | None | Lung | HA | Sepsis | Alive | 46 |  |  |  |  | -2 to +14 |  |  |  |  |
| Sa-202 | Infant | M | 2014 | None | SSTI | CA | None | Alive | 6 |  |  |  |  | 0 to +6 |  |  |  |  |
| Sa-204 | Infant | M | 2014 | Metabolic disease | CVC | HA | Sepsis | Alive | 25 |  | -4 to -3 |  |  |  |  |  | -4 to +6 |  |
| Sa-205 | Early adolescence | F | 2014 | Hematological disorder | CVC | HA | Sepsis | Alive | 46 |  |  |  |  |  |  |  | +3 to +45 |  |
| Sa-207 | Infant | F | 2014 | None | Bone | CA | None | Alive | 33 | 0 to +28 | 0 to +28 |  |  |  |  |  |  |  |
| Sa-208 | Early childhood | M | 2014 | Oncological disorder | None | HA | None | Alive | 12 | 0 to +7 | 0 to +7 |  |  |  |  |  |  |  |
| Sa-209 | Early childhood | F | 2014 | Oncological disorder | None | CA | None | Alive | 26 |  | +1 to +13 |  |  |  |  |  | ´+1 to +22 |  |
| Sa-210 | Toddler | M | 2014 | Hematological disorder | CVC | HA | Sepsis | Alive | 43 | 0 to +42 | 0 to +42 |  |  |  |  |  |  |  |
| Sa-211 | Early adolescence | M | 2014 | Oncological disorder | CVC | HA | Endocarditis | Alive | 22 | 0 to +14 |  | 0 to +2 |  |  |  |  | +1 to +11 |  |
| Sa-219 | Middle childhood | M | 2015 | Heart disease | Heart | CA | None | Alive | 47 | +3 to +44 |  | 0 to +12 |  |  |  |  | +16 to +27 |  |
| Sa-220 | Middle childhood | M | 2015 | Heart disease | Heart | CA | None | Alive | 47 | +2 to +43 |  |  |  |  |  |  | +5 to +26 |  |
| Sa-224 | Early adolescence | F | 2015 | Nephrophaty | OC | HA | Sepsis | Alive | 14 | +1 to +15 |  |  |  |  |  |  |  | 0 to +2 |
| Sa-225 | Early adolescence | F | 2015 | Nephrophaty | OC | HA | None | Alive | 21 | +12 to +22 |  |  |  |  |  |  |  | 0 to +12 |
| Sa-227 | Middle childhood | F | 2015 | Neurological disorder | SSTI | HA | None | Death | 16 |  |  |  | +5 to +7 |  |  |  | -2 to +5 |  |
| Sa-228 | Infant | M | 2015 | Gastrointestinal disorder | CVC | HA | None | Alive | 70 | 0 to +10 | 0 to +10 |  |  |  |  |  |  |  |
| Sa-230 | Early childhood | M | 2015 | Oncological disorder | None | CA | None | Alive | 11 | 0 to +10 | 0 to +3 |  |  |  |  |  |  |  |
| Sa-231 | Toddler | M | 2015 | Oncological disorder | Intra-abdominal infection | CA | None | Alive | 10 | +1 to +7 | -2 to +1 |  |  |  |  |  |  |  |
| Sa-232 | Middle childhood | M | 2015 | Oncological disorder | None | HA | None | Alive | 26 | 0 to +2 |  |  | +8 to +18 | +3 to +7 |  |  |  |  |
| Sa-233 | Early adolescence | M | 2015 | Nephrophaty | None | HA | None | Alive | 47 |  | +3 to +15 |  |  |  |  |  |  |  |
| Sa-234 | Early childhood | M | 2015 | Oncological disorder | CVC | HA | None | Alive | 11 | 0 to +10 | 0 to +10 |  |  |  |  |  |  |  |
| Sa-236 | Term neonatal | F | 2015 | None | None | CA | None | Alive | 1 |  |  |  |  |  |  |  |  |  |
| Sa-237 | Early adolescence | F | 2015 | Oncological disorder | OC | HA | None | Alive | 31 | 0 to +14 | 0 to +11 |  |  |  |  |  | +1 to +5 |  |
| Sa-238 | Early adolescence | F | 2015 | Oncological disorder | OC | HA | None | Alive | 31 | 0 to +14 | 0 to +11 |  |  |  |  |  | +1 to +5 |  |
| Sa-239 | Infant | F | 2015 | Neurological disorder | CVC | HA | None | Alive | 58 |  |  |  |  |  |  |  | -2 to +12 |  |
| Sa-240 | Early childhood | F | 2015 | Oncological disorder | None | HA | None | Alive | 18 | 0 to +12 |  |  |  |  |  |  |  |  |
| Sa-244 | Early adolescence | M | 2015 | None | CVC | HA | None | Alive | 19 | +1 to +6 |  |  |  |  |  |  |  |  |
| Sa-245 | Early childhood | M | 2015 | Oncological disorder | CVC | HA | Septic shock | *Death* | 32 | +3 to +5 |  |  |  |  |  |  | +4 to +8 |  |
| Sa-253 | Early adolescence | F | 2015 | Oncological disorder | Lung | HA | Septic shock | *Death* | 5 |  |  | +1 to +5 |  |  |  |  |  | +1 to +5 |
| Sa-254 | Infant | M | 2016 | Oncological disorder | None | HA | None | Alive | 27 | +1 to +12 | +1 to +9 |  |  |  |  |  |  |  |
| Sa-255 | Early adolescence | M | 2016 | Heart disease | Bone | CA | None | Alive | 18 | +3 to +16 | +1 to +3 |  |  | +1 to +2 |  |  |  |  |
| Sa-257 | Early childhood | F | 2016 | Oncological disorder | None | HA | None | Alive | 15 | +8 to +23 |  |  |  |  |  |  |  |  |
| Sa-258 | Infant | F | 2016 | Nephrophaty | Lung | HA | Septic shock | *Death* | 67 | +7 to +8 |  | +9 to +44 |  |  | +9 to +44 |  |  | +9 to +44 |
| Sa-261 | Toddler | M | 2016 | Oncological disorder | CVC | HA | None | Alive | 141 | +3 to +8 |  |  |  | -19 to -5 |  |  | -5 to +3 |  |
| Sa-262 | Early adolescence | M | 2016 | Neurological disorder | Bone | CA | None | Alive | 6 | +3 to +6 |  |  |  |  |  |  |  |  |
| Sa-263 | Middle childhood | M | 2016 | Nephrophaty | CVC | HA | None | Alive | 19 | +5 to +13 |  | 0 to +8 |  |  |  |  |  | 0 to +8 |
| Sa-264 | Early adolescence | F | 2016 | Neurological disorder | CVC | HA | None | Alive | 25 |  |  |  |  |  |  |  | -8 to +16 |  |
| Sa-265 | Early adolescence | F | 2016 | Neurological disorder | CVC | HA | None | Alive | 25 |  |  |  |  |  |  |  | -8 to +16 |  |
| Sa-266 | Early childhood | M | 2016 | Nephrophaty | CVC | HA | Neuroinfection | Alive | 107 |  |  |  |  |  |  |  | 0 to +78 |  |
| Sa-267 | Early adolescence | M | 2016 | Oncological disorder | OC | HA | Bacteremia | Alive | 23 | +1 to +14 |  |  |  |  |  |  | -2 to +1 |  |
| Sa-268 | Early adolescence | M | 2016 | Oncological disorder | Lung | HA | Sepsis | Alive | 18 | +1 to +14 |  |  |  |  |  |  |  |  |
| Sa-269 | Early adolescence | M | 2016 | Oncological disorder | Lung | HA | Septic shock | Alive | 84 | +4 to +18 | +2 to +4 |  |  | +2 to +3 |  |  | +21 to +38 |  |
| Sa-270 | Infant | F | 2016 | Congenital disease | CVC | HA | None | Alive | 154 | +6 to +22 | +4 to +6 |  |  |  |  |  | +4 to +6 |  |
| Sa-271 | Toddler | M | 2016 | Oncological disorder | Lung | HA | None | Death | 250 |  |  |  |  |  |  |  | +1 to +16 |  |
| Sa-273 | Middle childhood | M | 2016 | Hematological disorder | CVC | HA | Sepsis | Alive | 32 | +4 to +25 |  |  |  |  |  |  | +2 to +4 |  |
| Sa-274 | Early adolescence | M | 2016 | Genetic disorder | Lung | HA | None | Alive | 49 | -2 to +5 | 0 to +3 |  |  | -1 to +7 |  | -2 to +1 | +6 to +33 |  |

Deaths associated with infection are indicated in italics. The day of blood culture collection was considered day zero*.* PIF: Primary infectious focus, M: male; F: female; CVC: central venous catheter; OC: other catheter; CSF: Cerebrospinal fluid; SSTI: Skin and soft tissue infection; HA: Hospital acquired; CA: Community acquired; LHS: length of hospital stay; DC: Dicloxacillin; CRO: Ceftriaxone; CTX: Cefotaxime; CLI: Clindamycin; LZD: Linezolid; VAN: Vancomycin; TEC: Teicoplanin; MEM: Meropenem; CIP: Ciprofloxacin.
